# Supplementary material for: Pulsed Vacuum Arc Deposition of Nitrogen-Doped Diamond-like Coatings for Long-Term Hydrophilicity of Electrospun Poly(ε-caprolactone) Scaffolds
Source: MDPI journal article supplement (doi:10.3390/membranes12111080), 2022-10-31
Supplement: s1 [file s1]

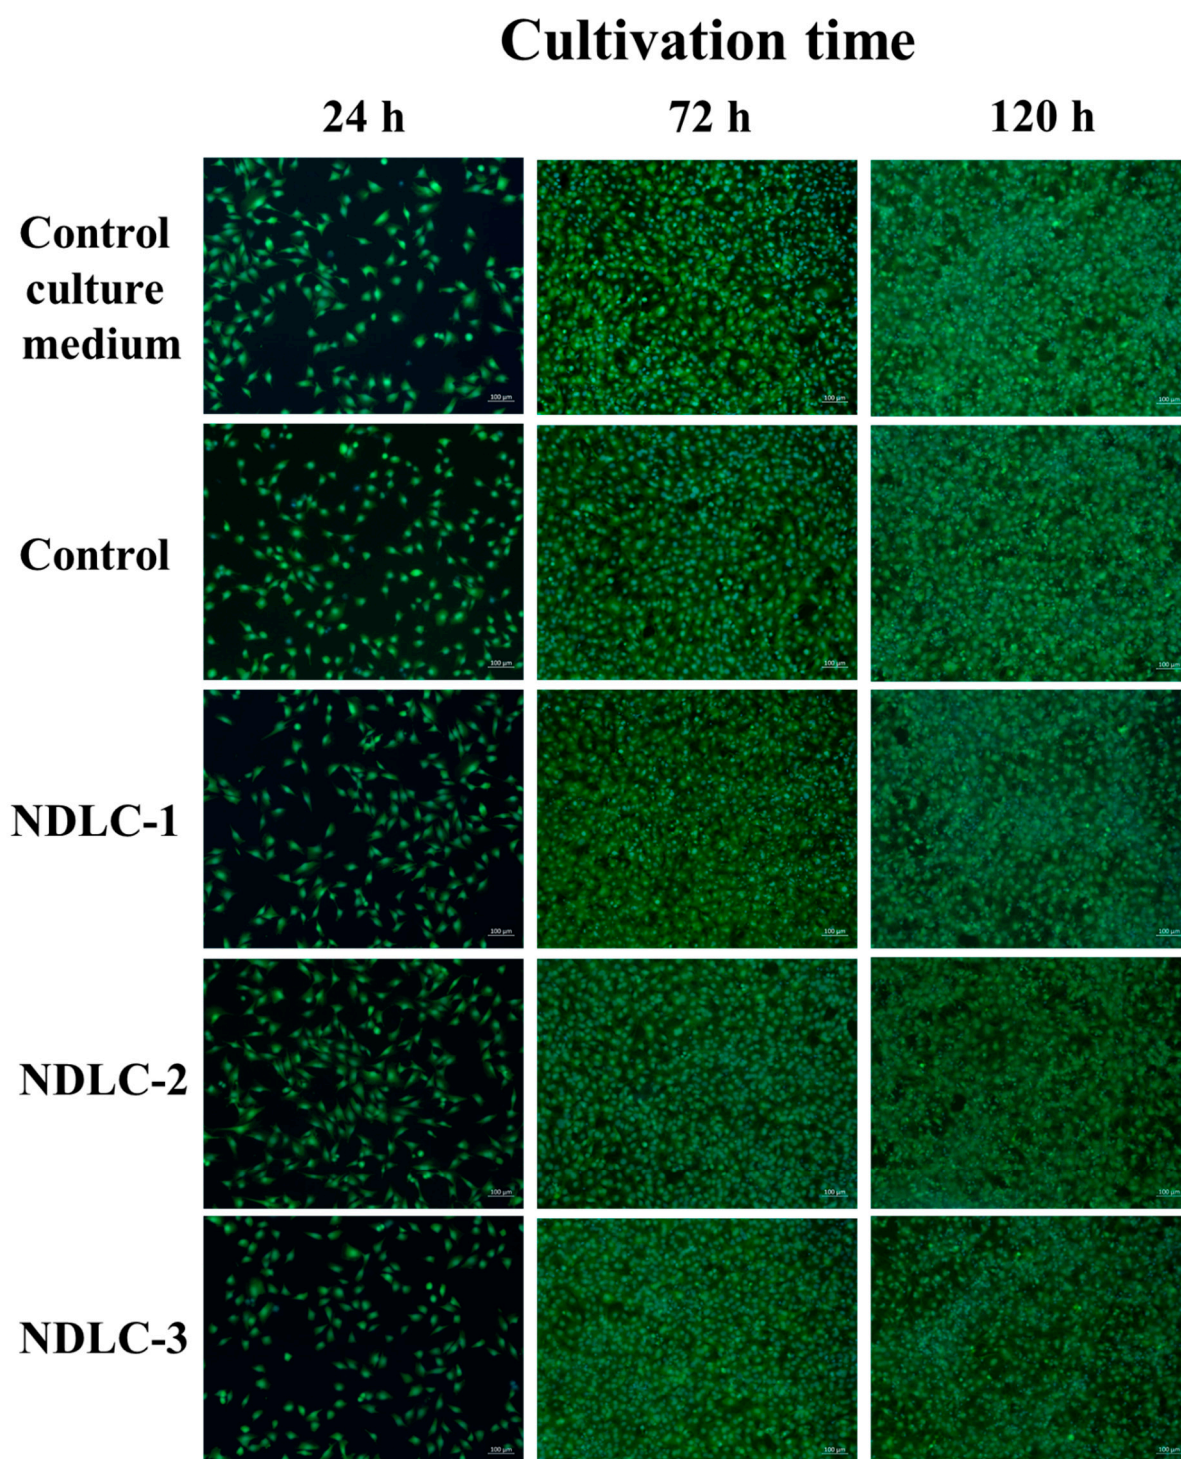

Figure S1. Images of the fluorescently labeled fibroblasts after 24, 72 and 120 h of cultivation with sample extracts.
